# Supplementary material for: Cysteines and Disulfide Bonds as Structure-Forming Units: Insights From Different Domains of Life and the Potential for Characterization by NMR
Source: PubMed Central journal article supplement (PMC7191308; doi:10.3389/fchem.2020.00280), 2020-04-23
Supplement: Data_Sheet_1.pdf [file Data_Sheet_1.pdf]

## *Supplementary Material*

# **Cysteines and disulfide bonds as structure-forming units: insights from different domains of life and the potential for characterisation by NMR**

**Christoph Wiedemann<sup>1\*</sup>, Amit Kumar<sup>2</sup>, Andras Lang<sup>2</sup>, Oliver Ohlenschläger<sup>2\*</sup>**

<sup>1</sup> Institute of Biochemistry and Biotechnology, Martin Luther University Halle-Wittenberg, Germany

<sup>2</sup> Leibniz Institute on Aging – Fritz Lipmann Institute, D-07745 Jena, Germany

**\* Correspondence:**

Christoph Wiedemann

christoph.wiedemann@biochemtech.uni-halle.de

Oliver Ohlenschläger

oliver.ohlenschlaeger@leibniz-fli.de

13 Figures and 1 Table

## Supplementary Material

### **1 Supplementary Figures**

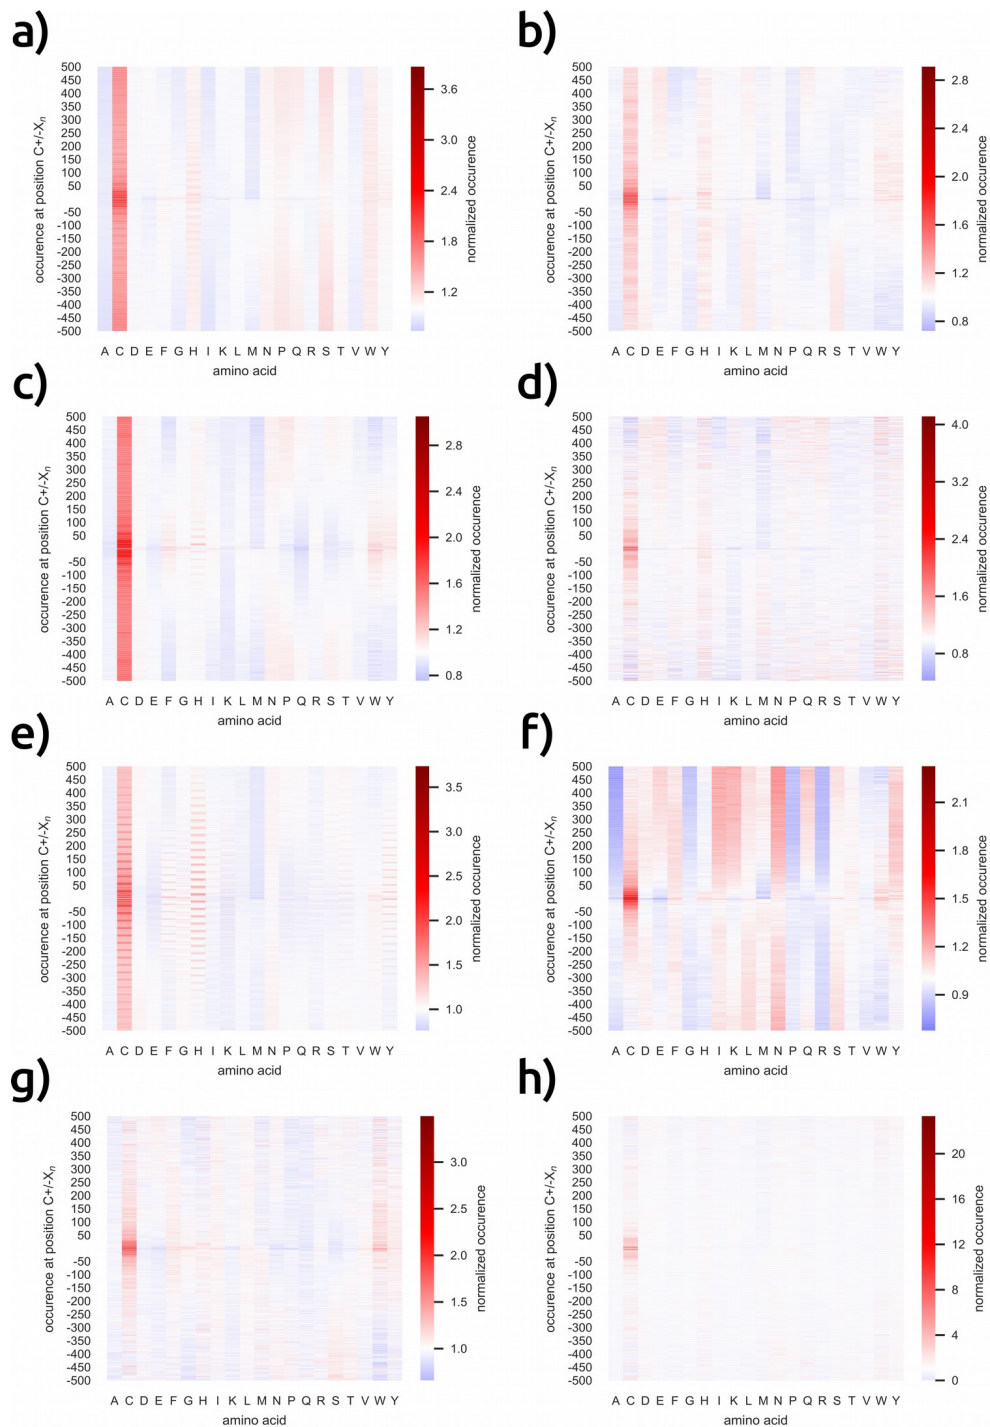

**Figure S1** The normalized amino acids occurrence N- (Cys-X<sub>n</sub>) and C-terminal (Cys+X<sub>n</sub>) next to a cysteine for the reviewed SwissProt (A), *A. thaliana* (B), *D. melanogaster* (C), *E. coli* (D), *H. sapiens* (E), *O. sativa* (F), *S. cerevisiae* (G) and *T. gammatolerans* (H) data set. The position of a cysteine is defined as 0. The normalization is achieved by calculating the distribution ratio (amino acid distribution at position n/overall amino acid distribution). A normalized occurrence (distribution ratio) >1 implies a higher amino acid frequency at this position than expected from the overall distribution and is color-coded in red. The reverse is true for a distribution ratio <1 and is color-coded in blue.

Supplementary Material

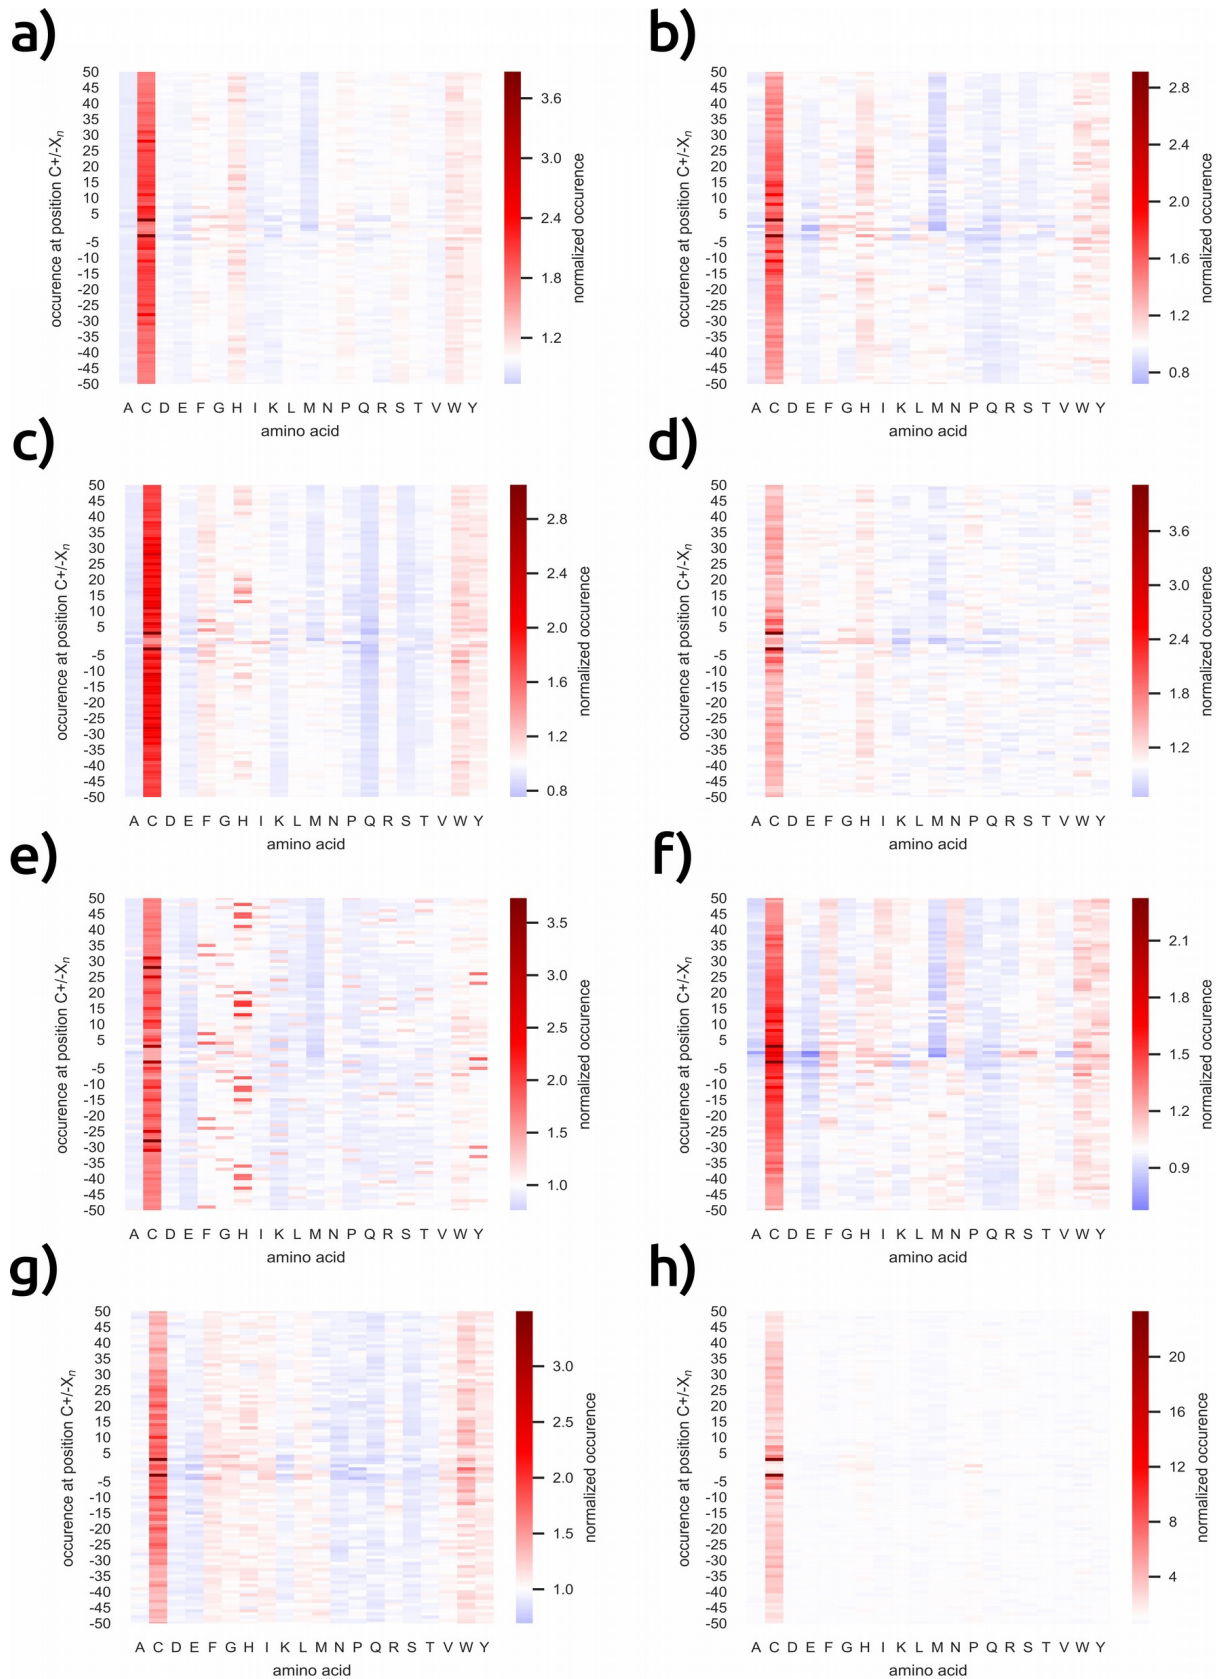

**Figure S2** The normalized amino acids occurrence N- (Cys- $X_n$ ) and C-terminal (Cys+ $X_n$ ) next to a cysteine for the SwissProt (a), *A. thaliana* (b), *D. melanogaster* (c), *E. coli* (d), *H. sapiens* (e), *O. sativa* (f), *S. cerevisiae* (g) and *T. gammatolerans* (h) data set. The position of a cysteine is defined as 0.

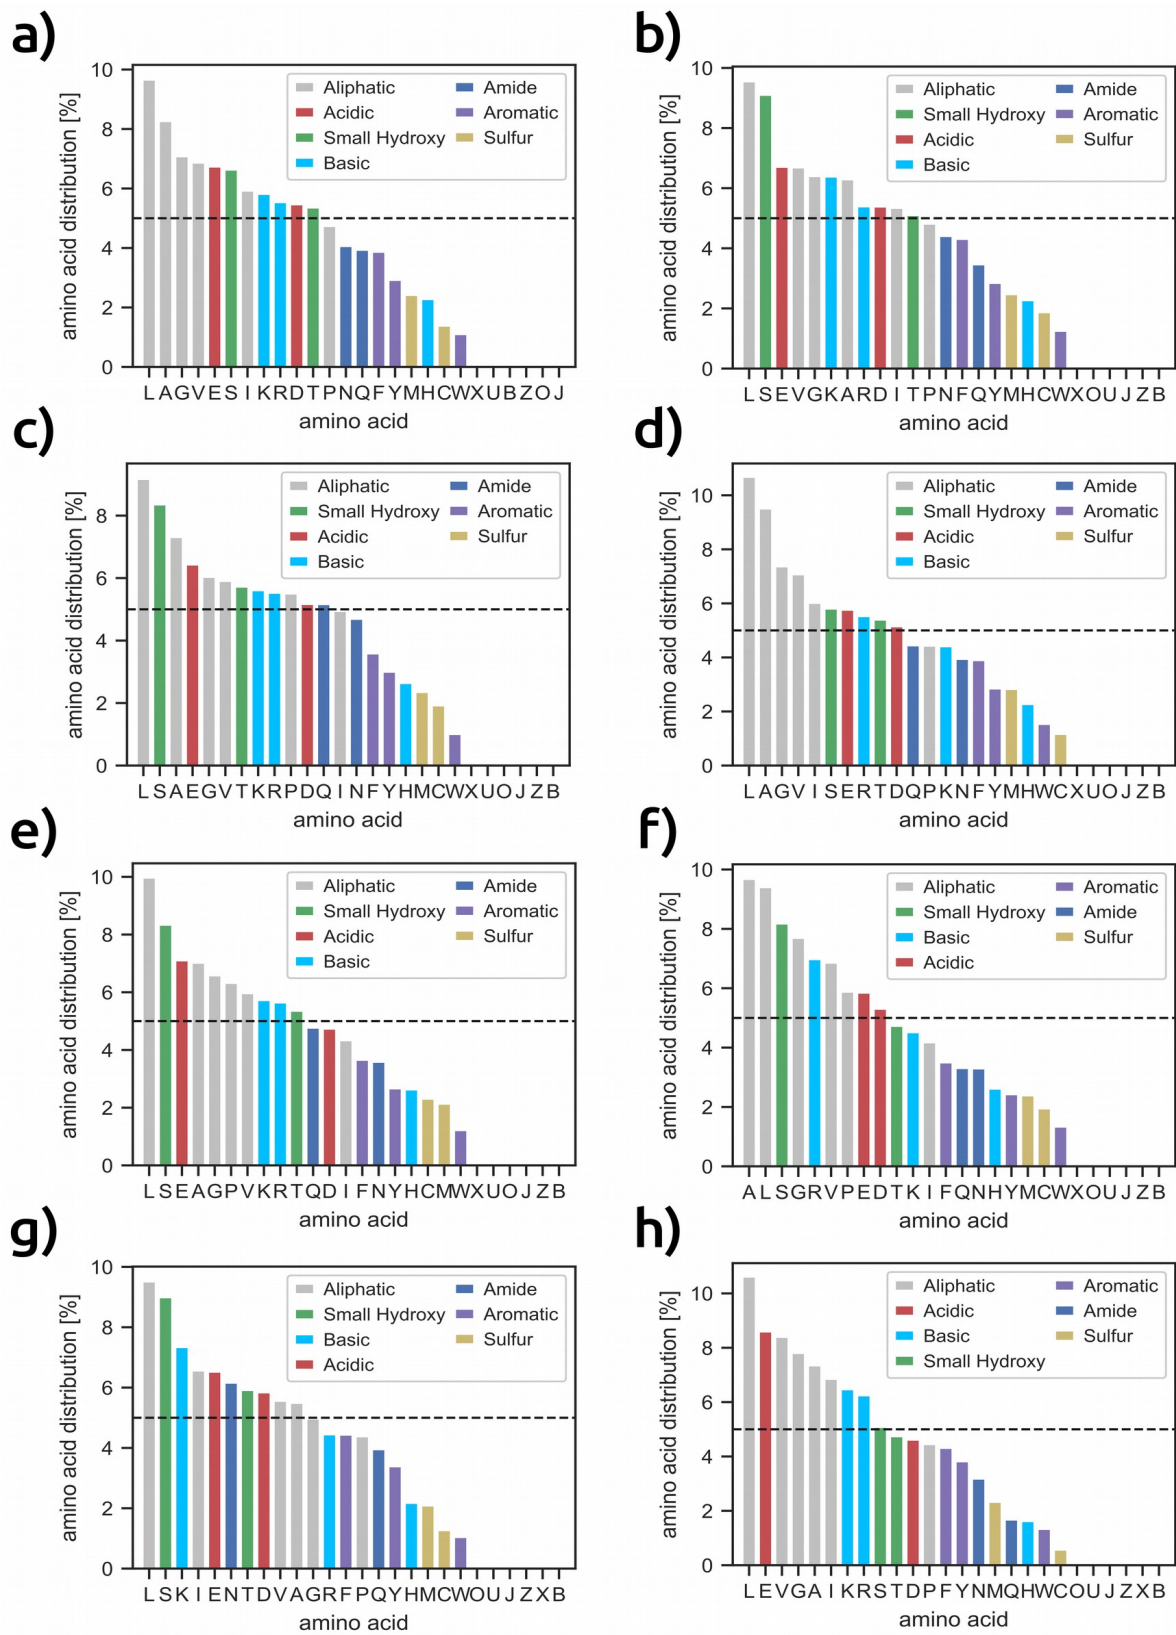

**Figure S3** Amino acid distribution for the SwissProt (a), *A. thaliana* (b), *D. melanogaster* (c), *E. coli* (d), *H. sapiens* (e), *O. sativa* (f), *S. cerevisiae* (g) and *T. gammatolerans* (h) proteome deposited in UniProt. Expanded IUPAC single letter amino acid code is applied.

Supplementary Material

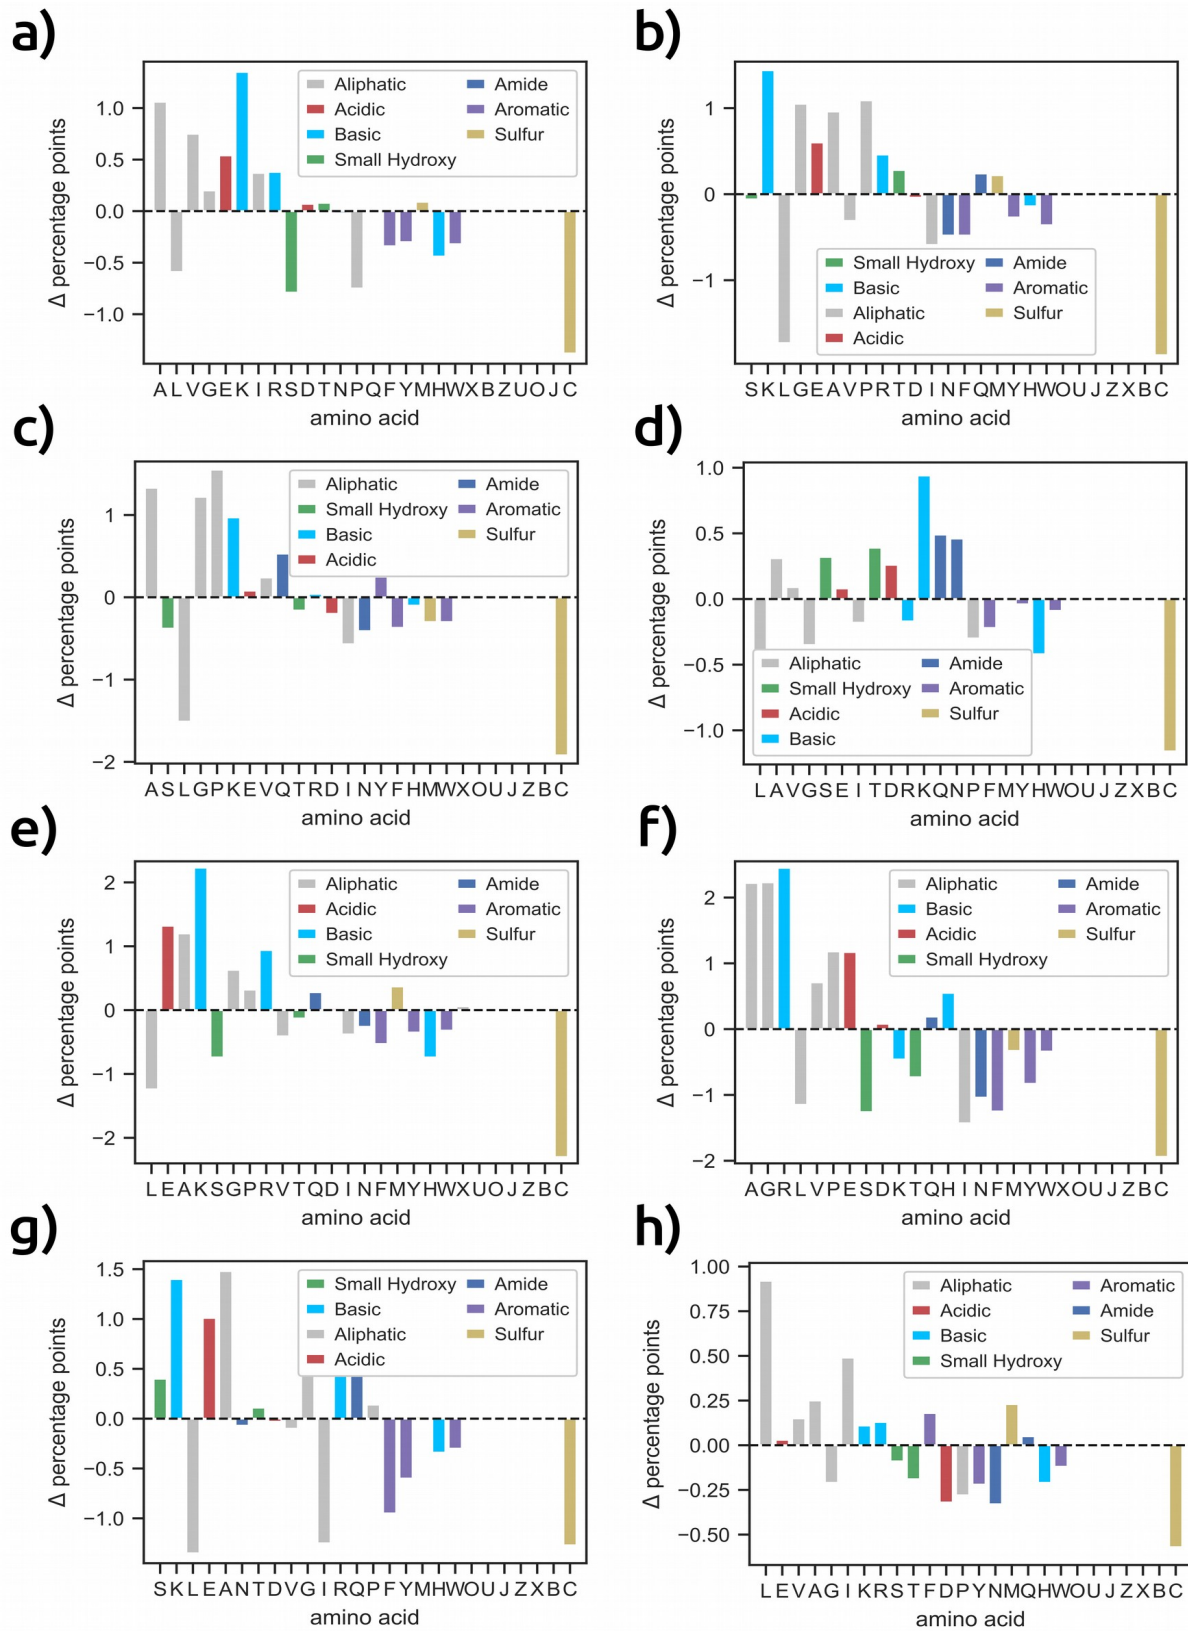

**Figure S4** Difference in amino acid distribution between cysteine-free and cysteine-containing proteins for the SwissProt (a), *A. thaliana* (b), *D. melanogaster* (c), *E. coli* (d), *H. sapiens* (e), *O. sativa* (f), *S. cerevisiae* (g) and *T. gammatolerans* (h) proteome deposited in UniProt. Expanded IUPAC single letter amino acid code is applied.

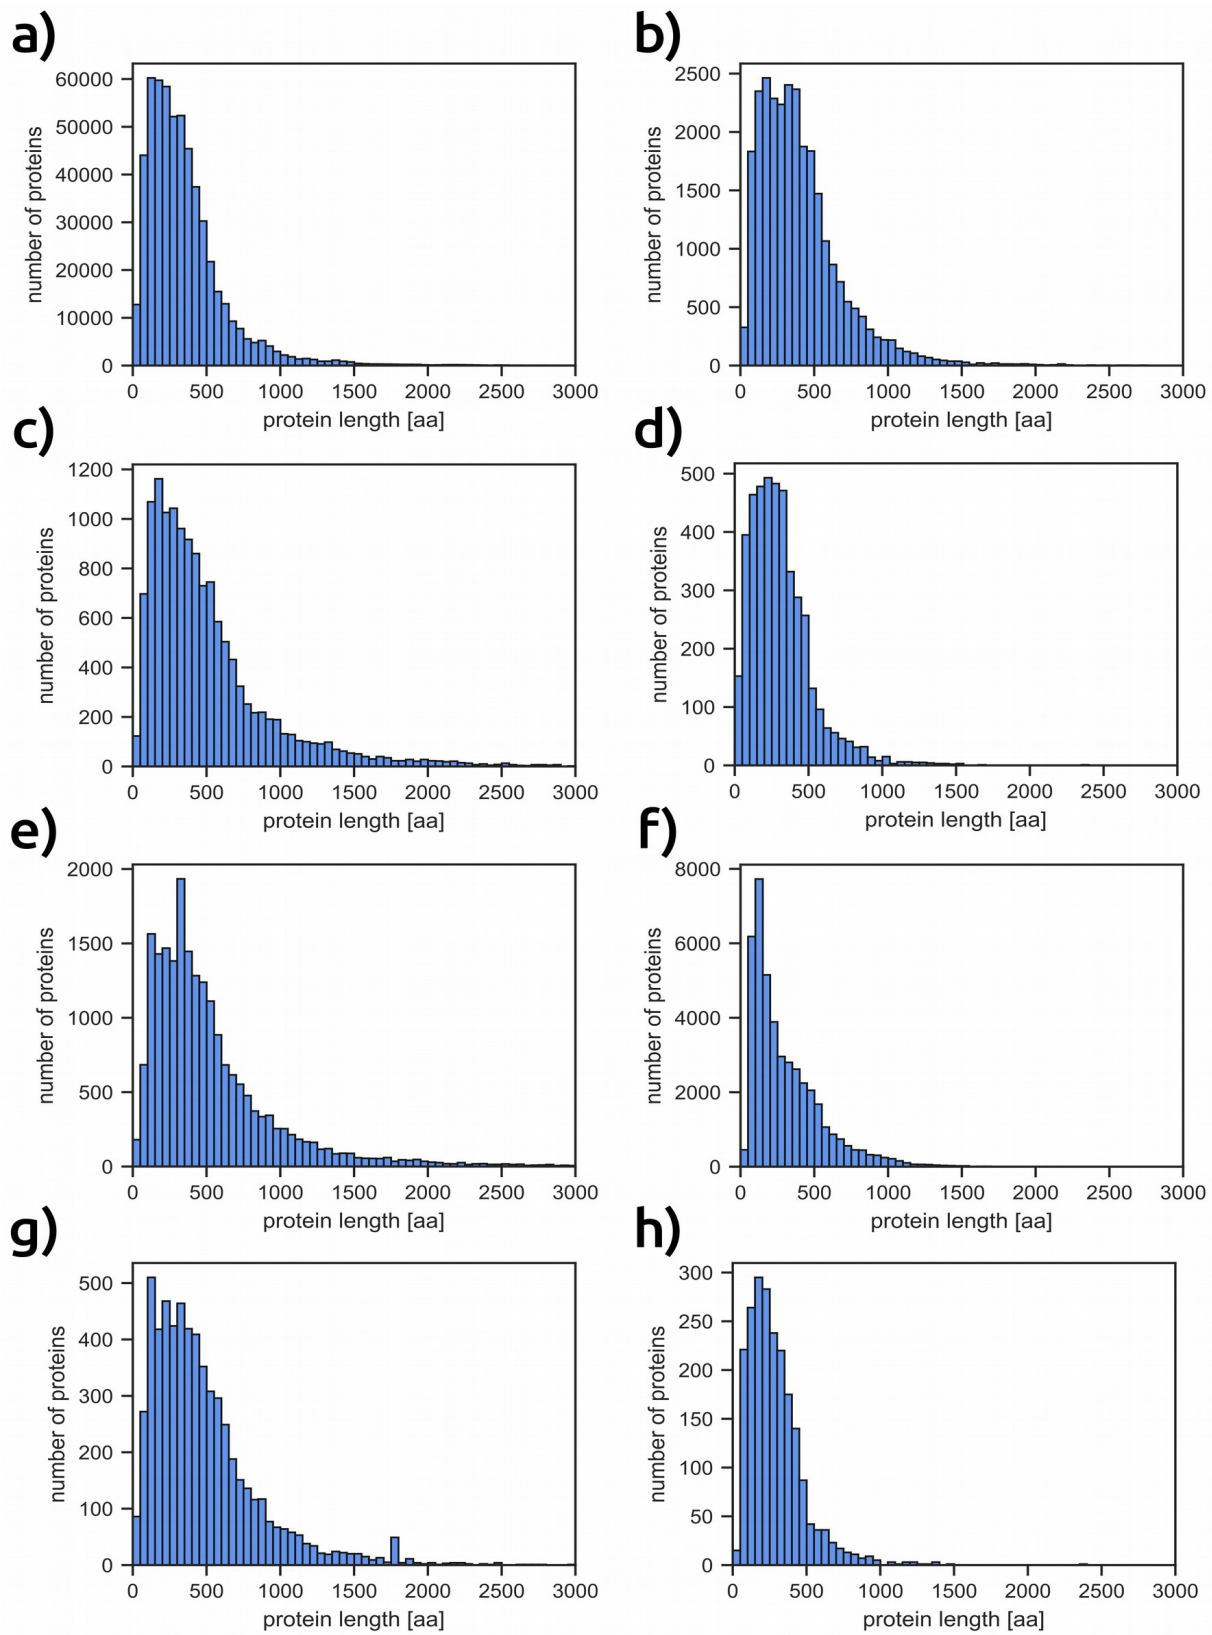

**Figure S5** Genomic protein length distribution for the SwissProt (a), *A. thaliana* (b), *D. melanogaster* (c), *E. coli* (d), *H. sapiens* (e), *O. sativa* (f), *S. cerevisiae* (g) and *T. gammatolerans* (h) proteome deposited in UniProt. Bin size is 100 a.a.

Supplementary Material

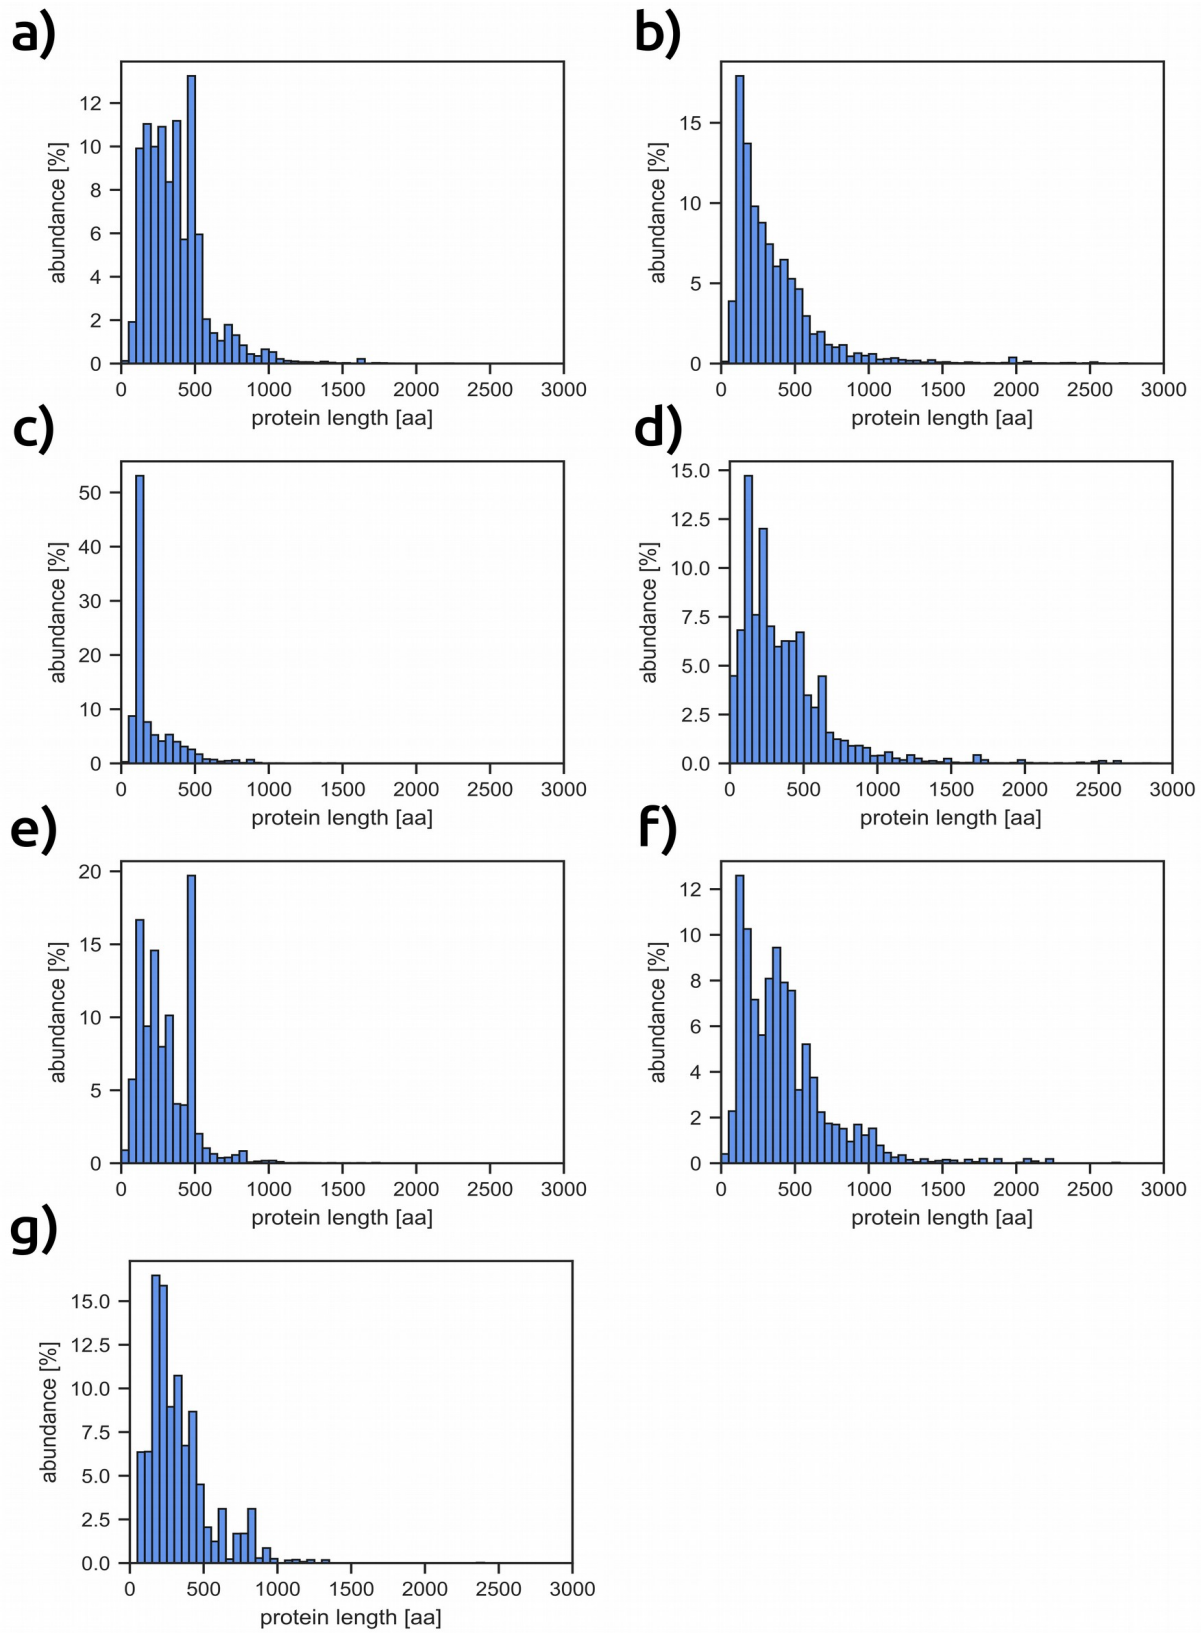

**Figure S6** Abundance weighted protein length distribution for the *A. thaliana* (a), *D. melanogaster* (b), *E. coli* (c), *H. sapiens* (d), *O. sativa* (e), *S. cerevisiae* (f) and *T. gammatolerans* (g) proteome deposited in PAXdb. Bin size is 100 a.a.



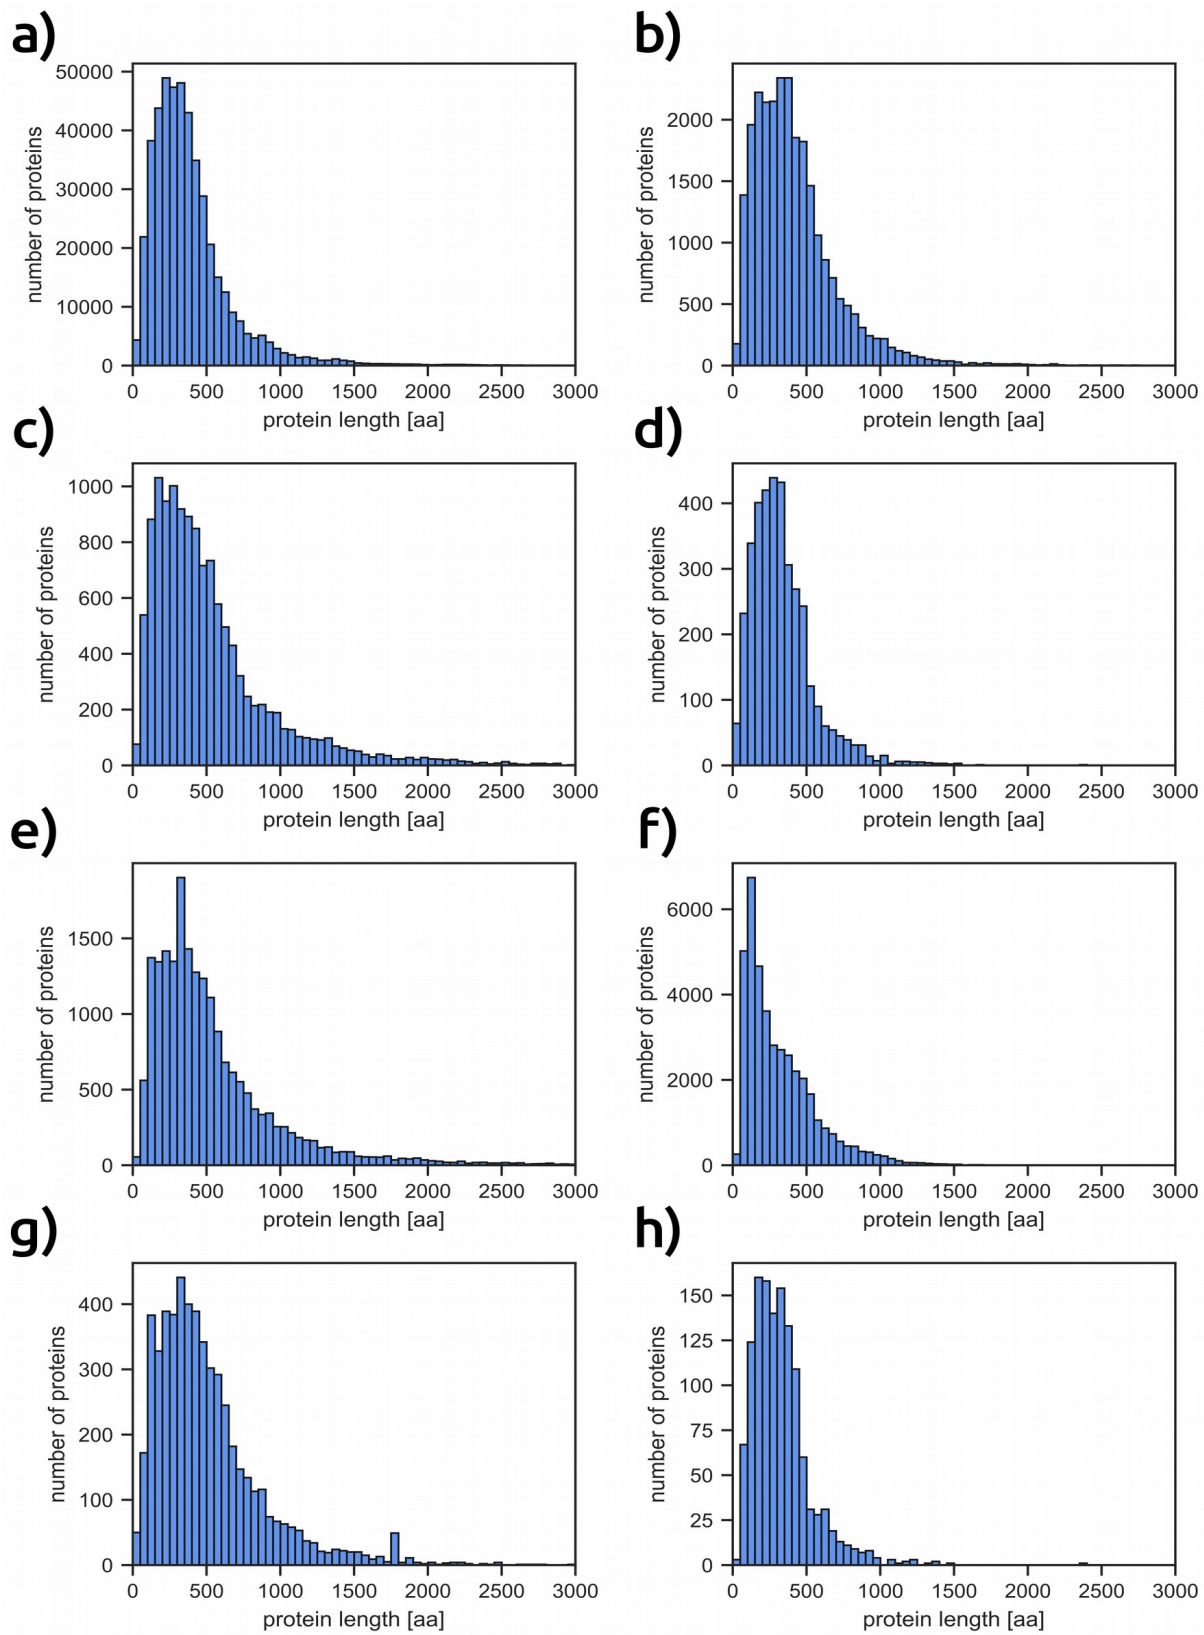

**Figure S7** Genomic protein length distribution of cysteine-containing proteins in the SwissProt (a), *A. thaliana* (b), *D. melanogaster* (c), *E. coli* (d), *H. sapiens* (e), *O. sativa* (f), *S. cerevisiae* (g) and *T. gammatolerans* (h) proteome deposited in UniProt. Bin size is 100 a.a.

Supplementary Material

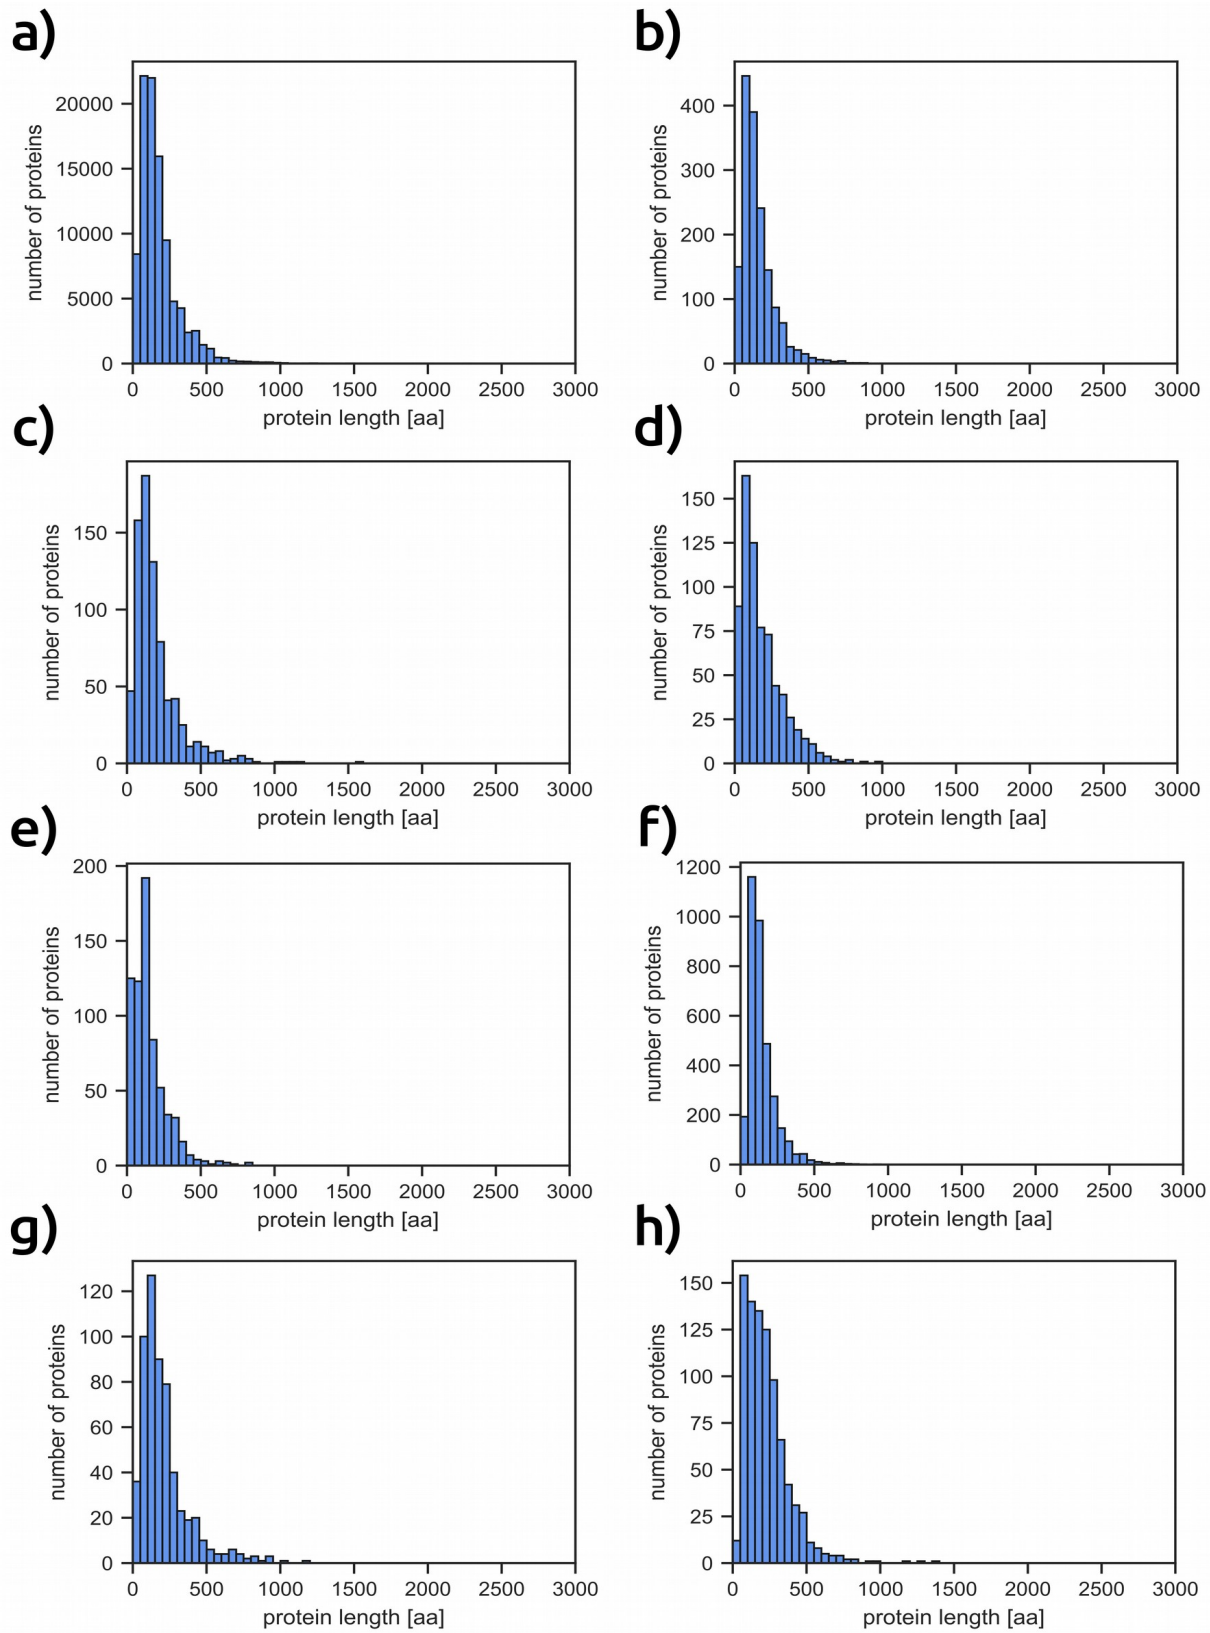

**Figure S8** Genomic protein length distribution of cysteine-free proteins in the SwissProt (a), *A. thaliana* (b), *D. melanogaster* (c), *E. coli* (d), *H. sapiens* (e), *O. sativa* (f), *S. cerevisiae* (g) and *T. gammatolerans* (h) proteome deposited in UniProt. Bin size is 100 a.a.

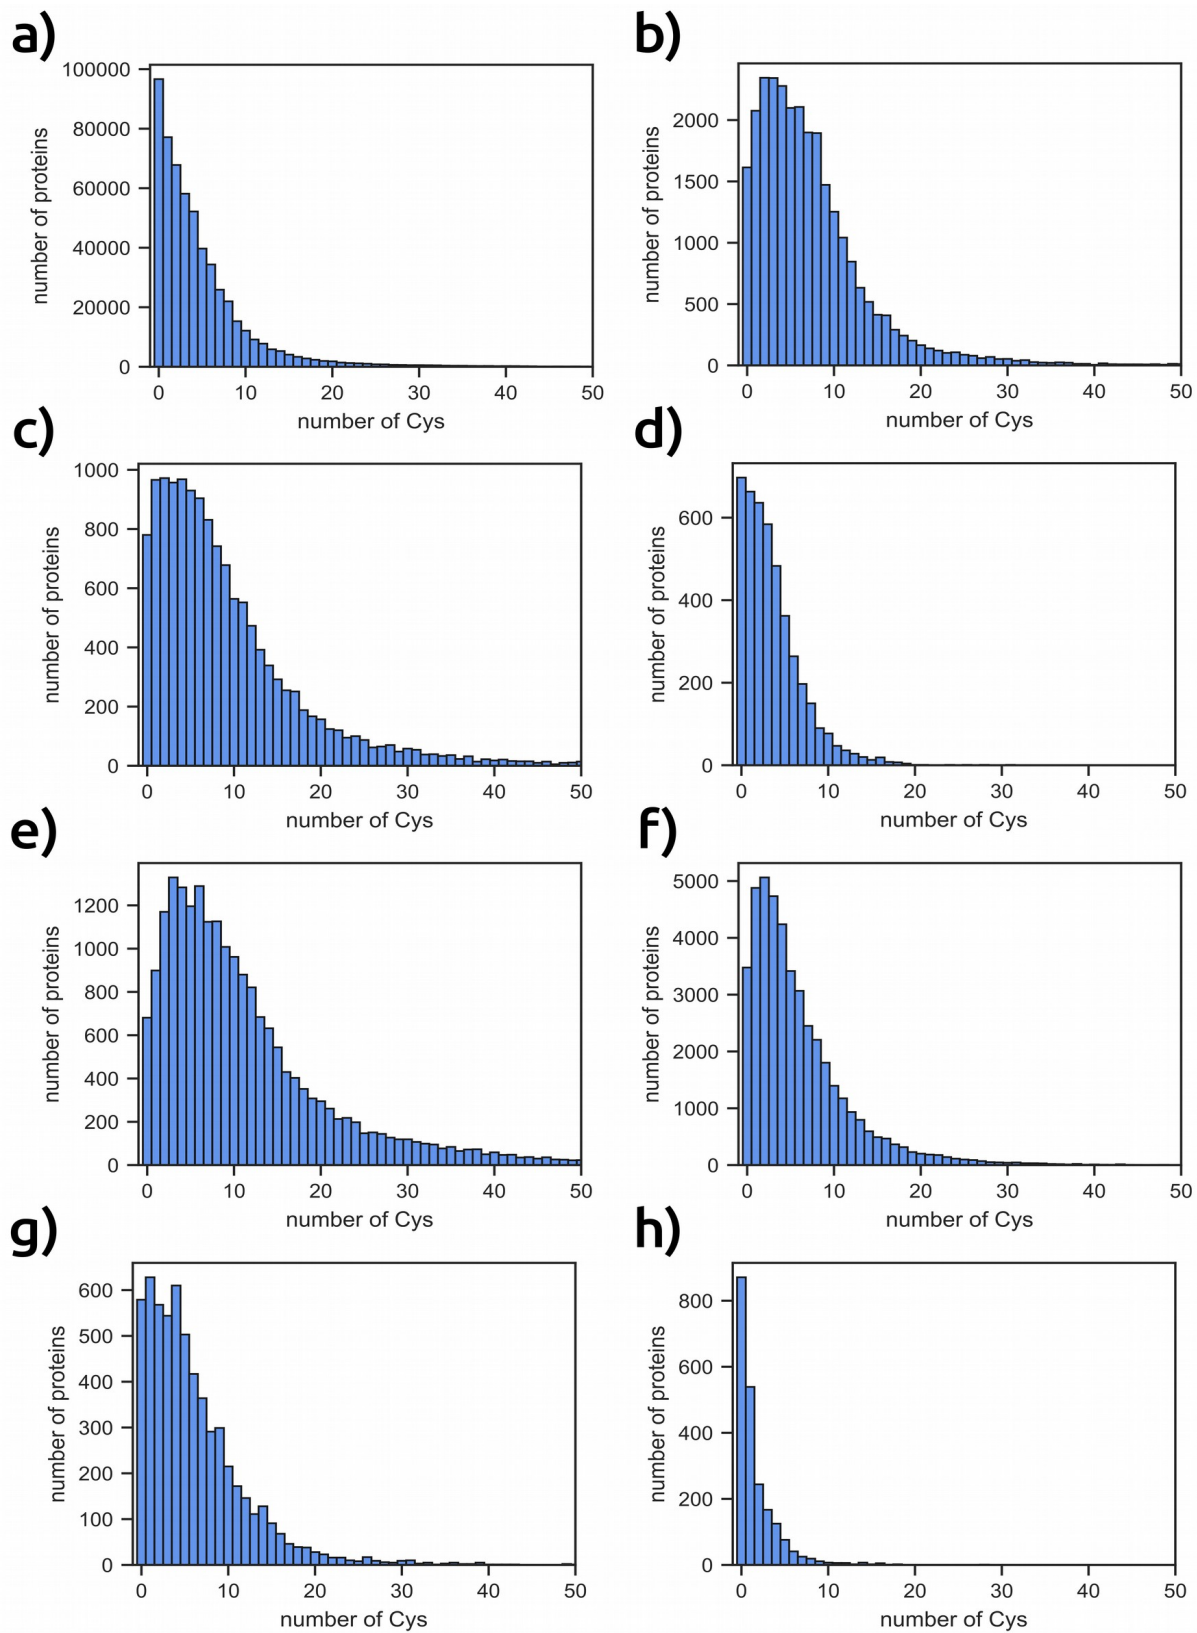

**Figure S9** Genomic cysteine distribution in the SwissProt (a), *A. thaliana* (b), *D. melanogaster* (c), *E. coli* (d), *H. sapiens* (e), *O. sativa* (f), *S. cerevisiae* (g) and *T. gammatolerans* (h) proteome deposited in UniProt. Bin size is 1.

Supplementary Material

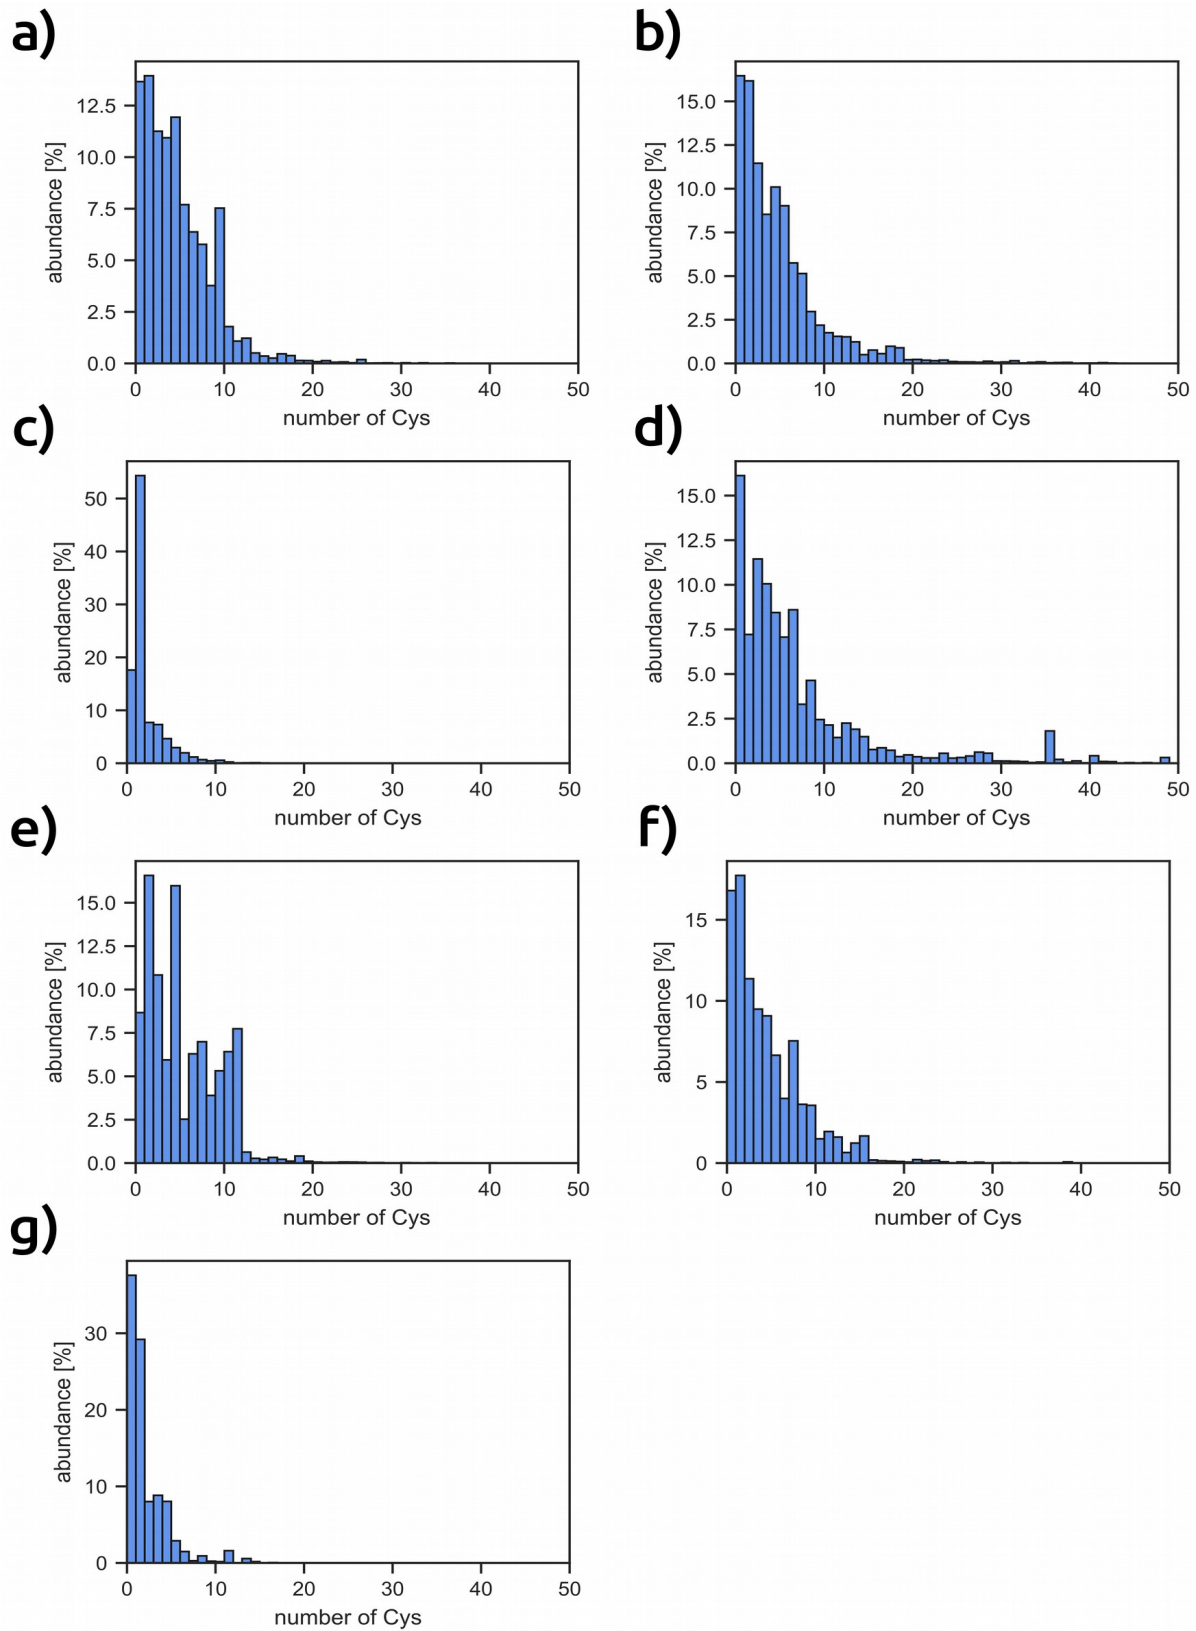

**Figure S10** Abundance weighted cysteine distribution in the *A. thaliana* (a), *D. melanogaster* (b), *E. coli* (c), *H. sapiens* (d), *O. sativa* (e), *S. cerevisiae* (f) and *T. gammatolerans* (g) proteome deposited in PAXdb. Bin size is 1.

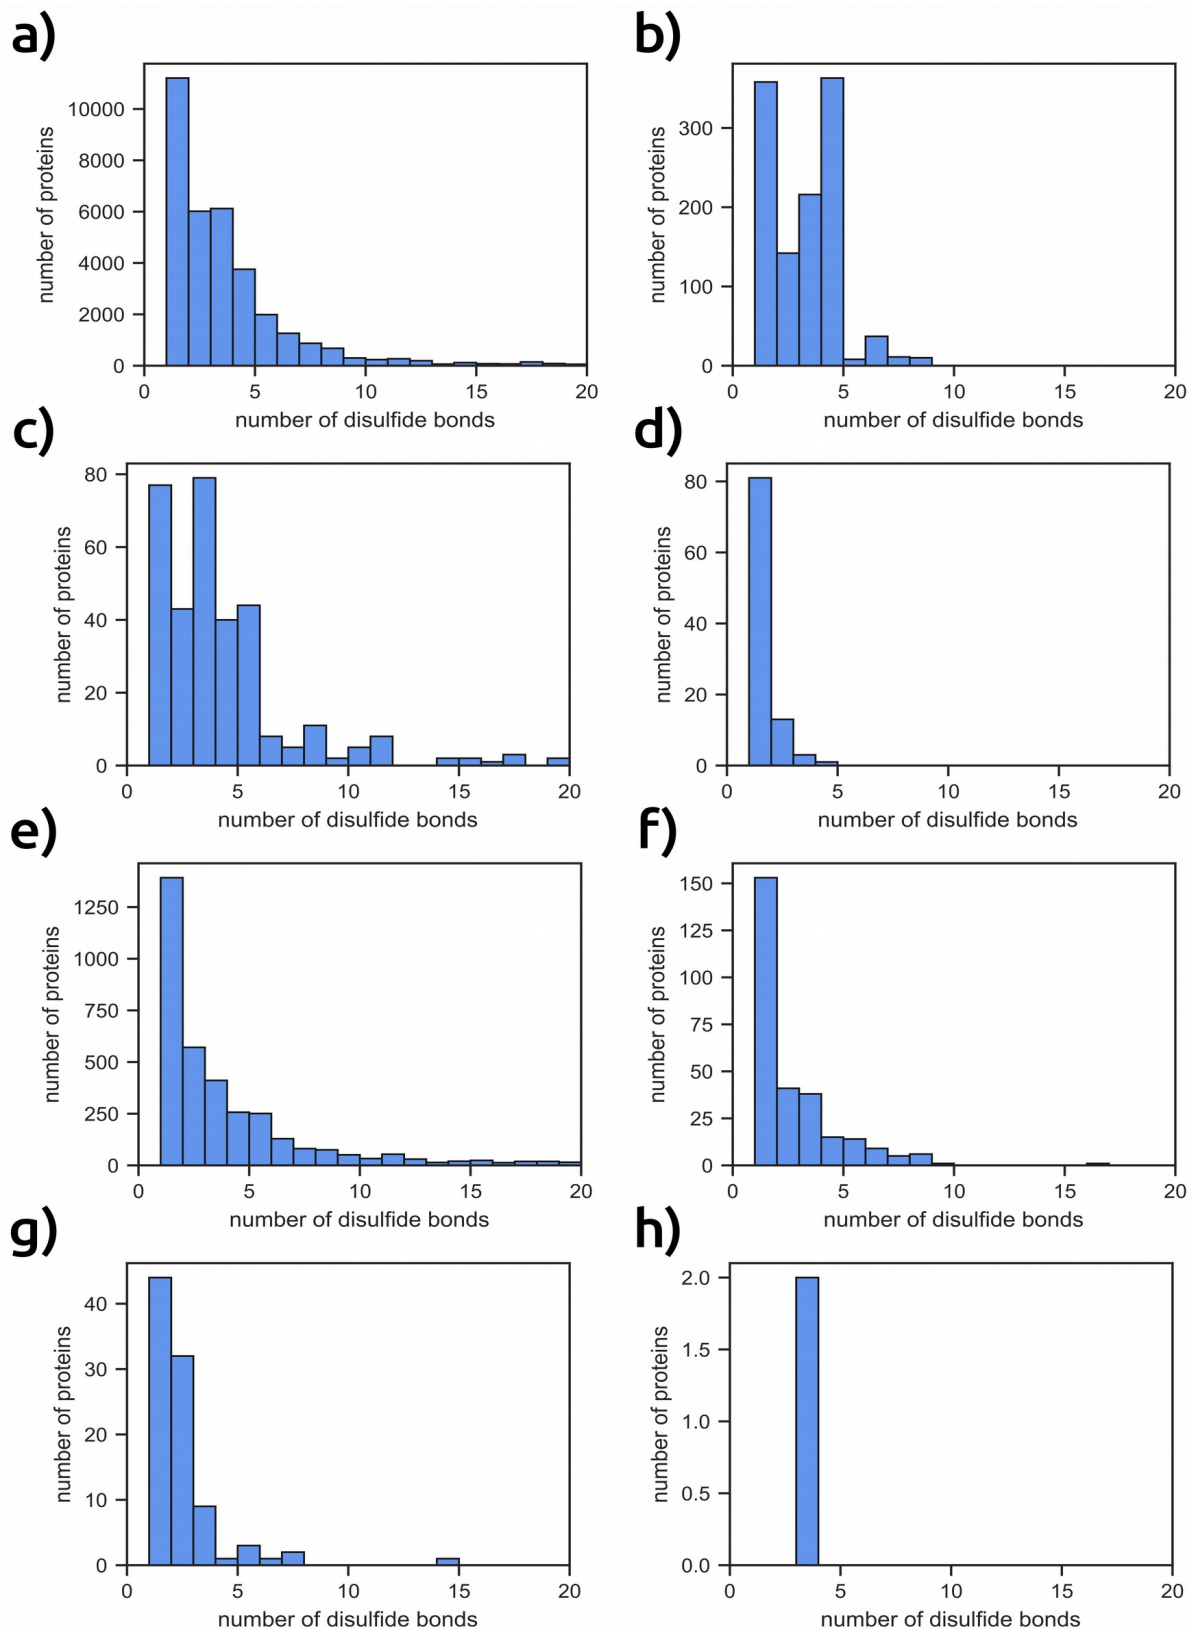

**Figure S11** Genomic disulfide bond distribution of reviewed proteins in the SwissProt (a), *A. thaliana* (b), *D. melanogaster* (c), *E. coli* (d), *H. sapiens* (e), *O. sativa* (f), *S. cerevisiae* (g) and *T. gammatolerans* (h) proteome deposited in UniProt. For *T. gammatolerans* (h) also unreviewed proteins are considered because reviewed proteins contain no disulfide bonds. Bin size is 1.

Supplementary Material

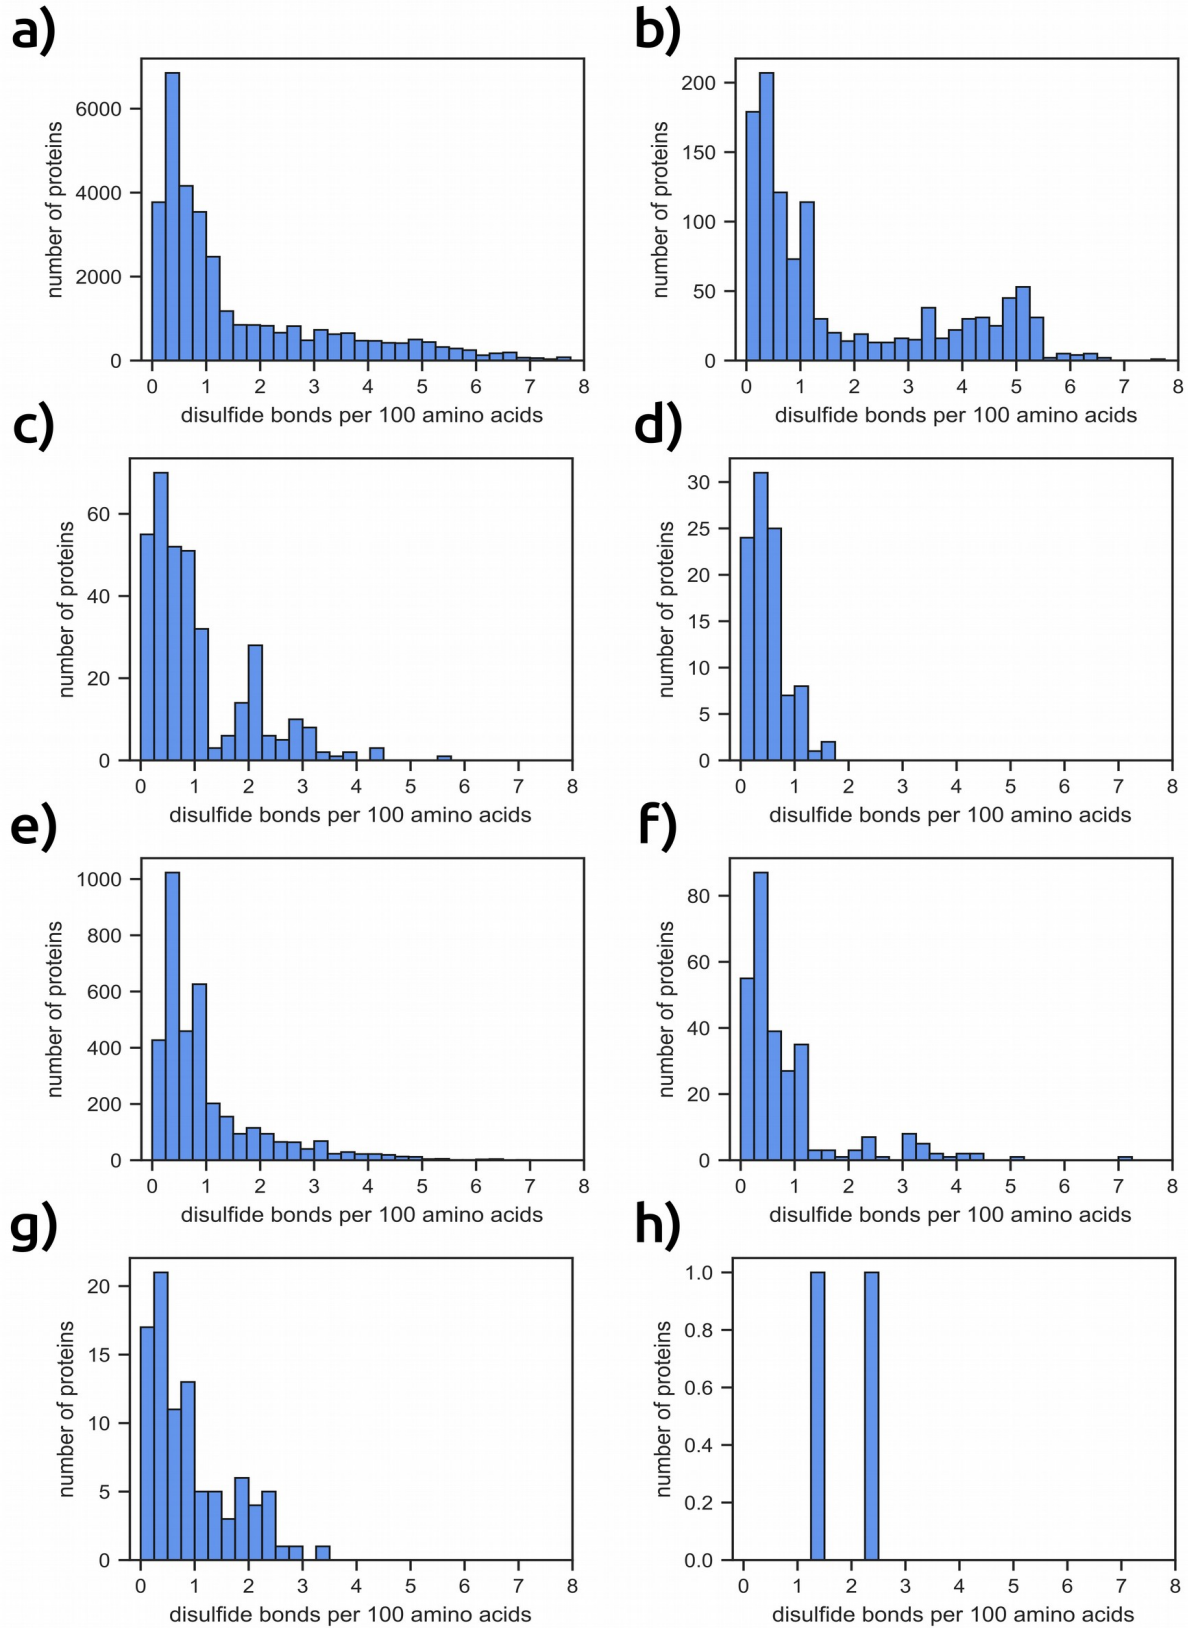

**Figure S12** Disulfide bond frequency distribution of reviewed proteins in the SwissProt (a), *A. thaliana* (b), *D. melanogaster* (c), *E. coli* (d), *H. sapiens* (e), *O. sativa* (f), *S. cerevisiae* (g) and *T. gammatolerans* (h) proteome deposited in UniProt. For *T. gammatolerans* (h) also unreviewed proteins are considered because reviewed proteins contain no disulfide bonds. Bin size is 1.

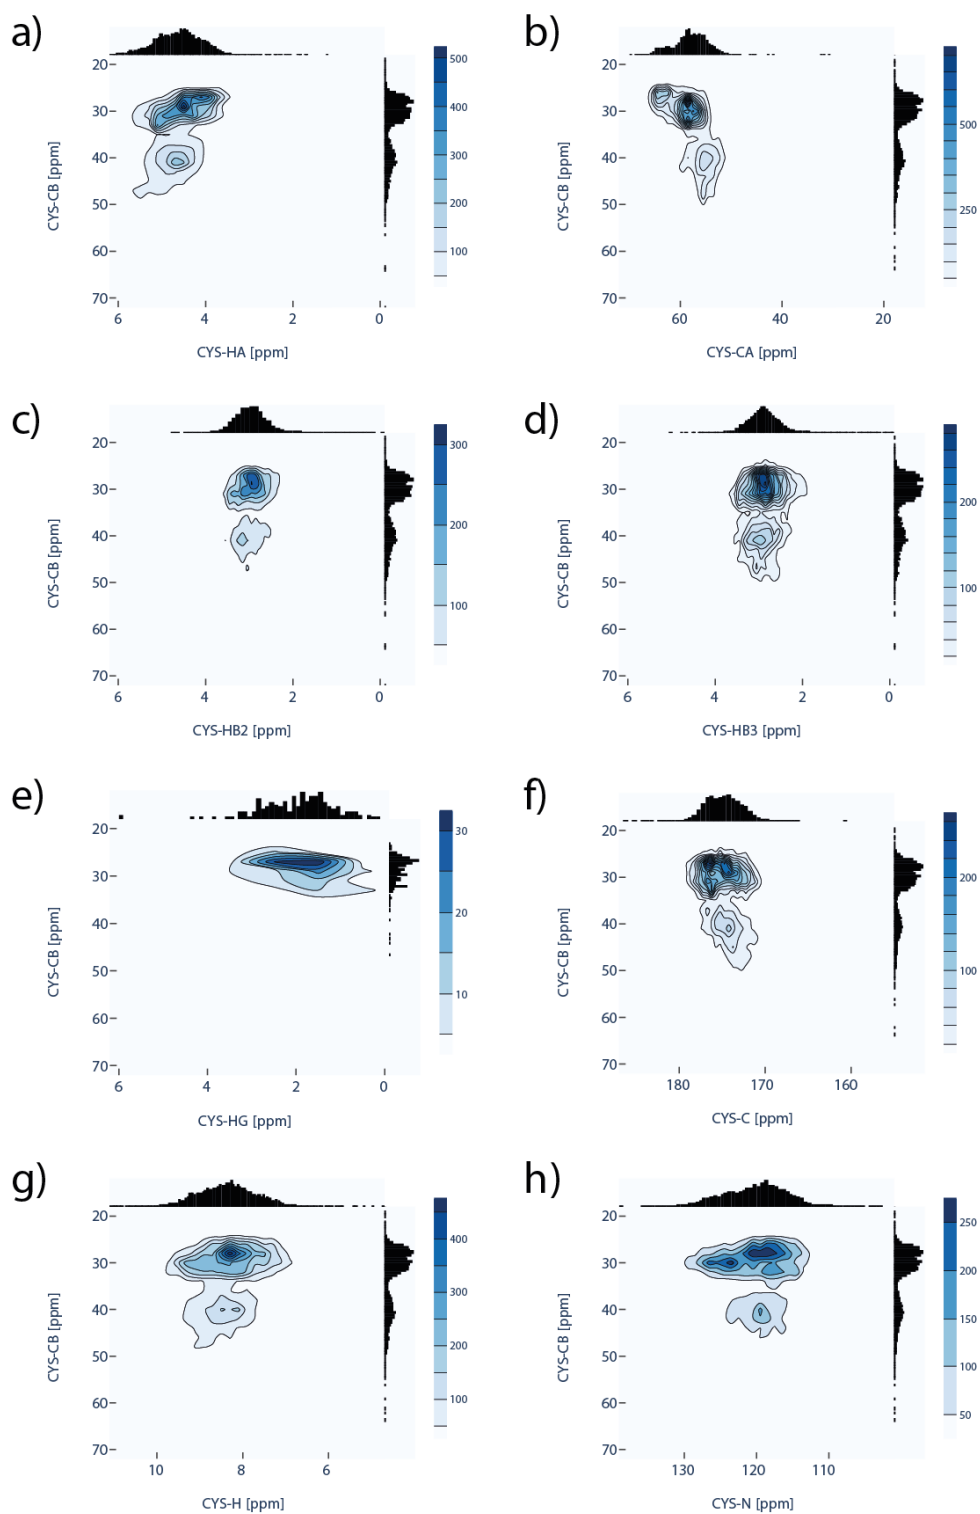

**Figure S13** Chemical shift correlation of cysteine C<sup>β</sup> and H<sup>α</sup> (A), C<sup>α</sup> (B), H<sup>β2</sup> (C), H<sup>β3</sup> (D), H<sup>γ</sup> (E), C' (F), H<sup>N</sup> (G), N' (H), respectively. Chemical shift data and correlations are obtained and visualized from the Biological Magnetic Resonance Data Bank(BMRB) with the help of a modified PyBMRB python module. Distribution values which are outside ten times the standard deviation were removed from each correlation data set. Contour levels reflect the total number of correlations within.

Supplementary Material

**Table S1.** Proteomic abundance weighted analysis

| Species                | Number of proteins / proteins with Cys in fasta file | Median length all / proteins with Cys / proteins without Cys | Proteins / proteins with 0 ppm in abundance file | Abundance weighted median length all proteins / proteins with Cys / proteins without Cys | Median Cys per protein (abundance weighted) / proteins with Cys |
|------------------------|------------------------------------------------------|--------------------------------------------------------------|--------------------------------------------------|------------------------------------------------------------------------------------------|-----------------------------------------------------------------|
| <i>A.thaliana</i>      | 27 416 / 25 760 (94%)                                | 348 / 362 / 122                                              | 20 185 / 152                                     | 337 / 360 / 187                                                                          | 6 (4) / 6 (4)                                                   |
| <i>D.melanogaster</i>  | 13 937 / 13 110 (94%)                                | 393 / 411 / 144                                              | 13 264 / 1                                       | 271 / 321 / 150                                                                          | 7 (3) / 7 (4)                                                   |
| <i>E.coli</i>          | 4 146 / 3 515 (85%)                                  | 282 / 301 / 150                                              | 4 096 / 367                                      | 144 / 144 / 130                                                                          | 3 (1) / 3 (1)                                                   |
| <i>H.sapiens</i>       | 20 457 / 19 797 (97%)                                | 410 / 421 / 126                                              | 19 949 / 611                                     | 283 / 338 / 102                                                                          | 9 (4) / 9 (5)                                                   |
| <i>O.sativa</i>        | 57 939 / 54 152 (93%)                                | 328 / 353 / 105                                              | 5 656 / 0                                        | 260 / 284 / 145                                                                          | 6 (4) / 6 (4)                                                   |
| <i>S.cerevisiae</i>    | 6 692 / 6 065 (91%)                                  | 359 / 386 / 154                                              | 6 440 / 2                                        | 363 / 412 / 152                                                                          | 4 (3) / 5 (4)                                                   |
| <i>T.gammatolerans</i> | 2 156 / 1 285 (60%)                                  | 251 / 298 / 198                                              | 1 341 / 0                                        | 268 / 335 / 226                                                                          | 1 (1) / 2 (2)                                                   |
